# Supplementary material for: <em>Hovenia dulcis</em> Fruit Peduncle Polysaccharides Reduce Intestinal Dysbiosis and Hepatic Fatty Acid Metabolism Disorders in Alcohol-Exposed Mice
Source: Preprints.org preprint supplement (doi:10.20944/preprints202401.1447.v1), 2024-01-19
Supplement: Supplementary file 1 [file supplementary]

Approval Opinion of Ethics Review for  
the Laboratory Animal Welfare

No. MTI-IACUC-2022-007

To: Professor Xudong Liu and PhD Liangyu Liu  
Department of Food Science and Engineering, Moutai Institute

May 23, 2022

Dear Professor Xudong Liu and PhD Liangyu Liu:

According to the task documents of Guizhou Provincial Basic Research Program (Natural Science) (Qiankehejichu-ZK[2022]yiban541 and Qiankehejichu-ZK[2022]yiban542) and Zunyi Science and Technology projects (Zunshikehe-HZzi[2021]330 and Zunshikehe-HZzi[2022]169), under the supervision and assessment by laboratory animal ethics committee, your application for the use of laboratory animal has been approved. The total number of rats and mice limited within 300. Please take care of the animal's life in good condition and keep respect to their lives when your team undertakes experiment with them.

Here approved.

Laboratory Animal Ethics Committee  
Department of scientific research, Moutai Institute

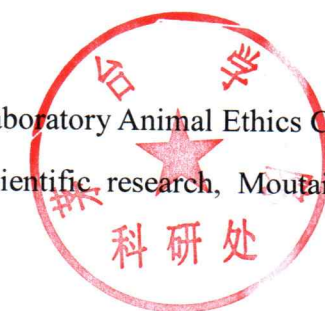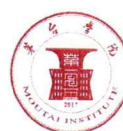

茅台学院  
MOUTAI INSTITUTE
